# Supplementary material for: “Let’s better not choose someone with HIV”: Dutch professionals’ attitudes and job promotion decisions regarding candidates living with HIV and the mediating role of employability concerns
Source: bioRxiv or medRxiv preprint supplement (doi:10.1101/2024.08.21.24312366), 2024-08-21
Supplement: Supplementary file [file media-1.pdf]

## Supplementary material

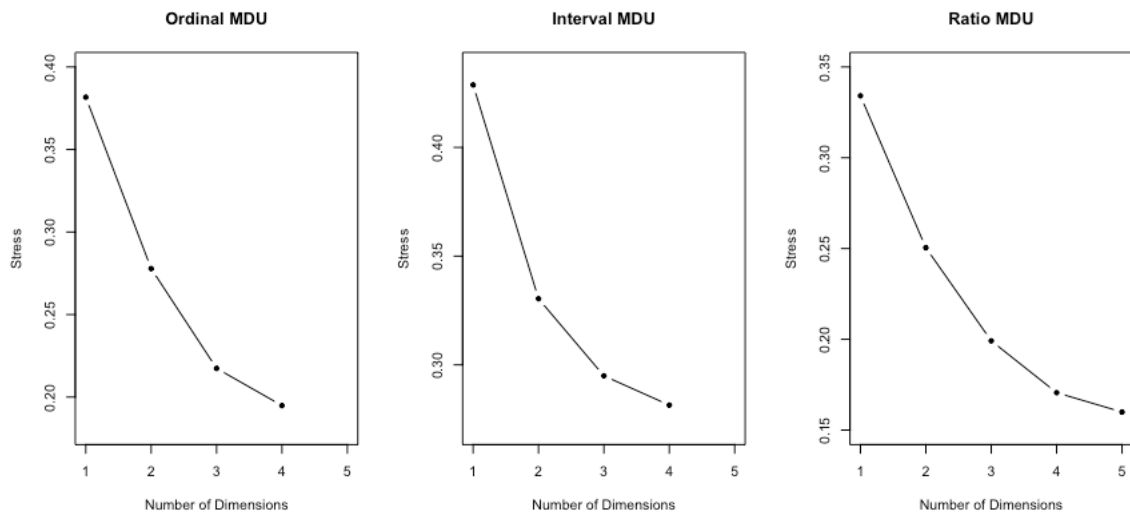

**Figure S1.** Scree plots for ordinal MDU, interval MDU, and ratio MDU solutions

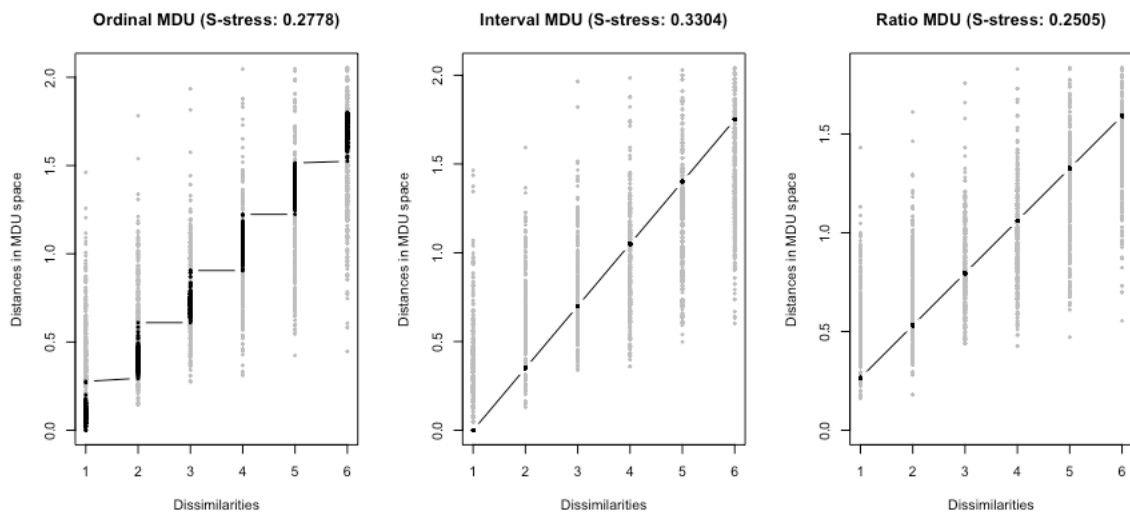

**Figure S2.** Shepard diagrams for ordinal MDU, interval MDU, and ratio MDU solutions

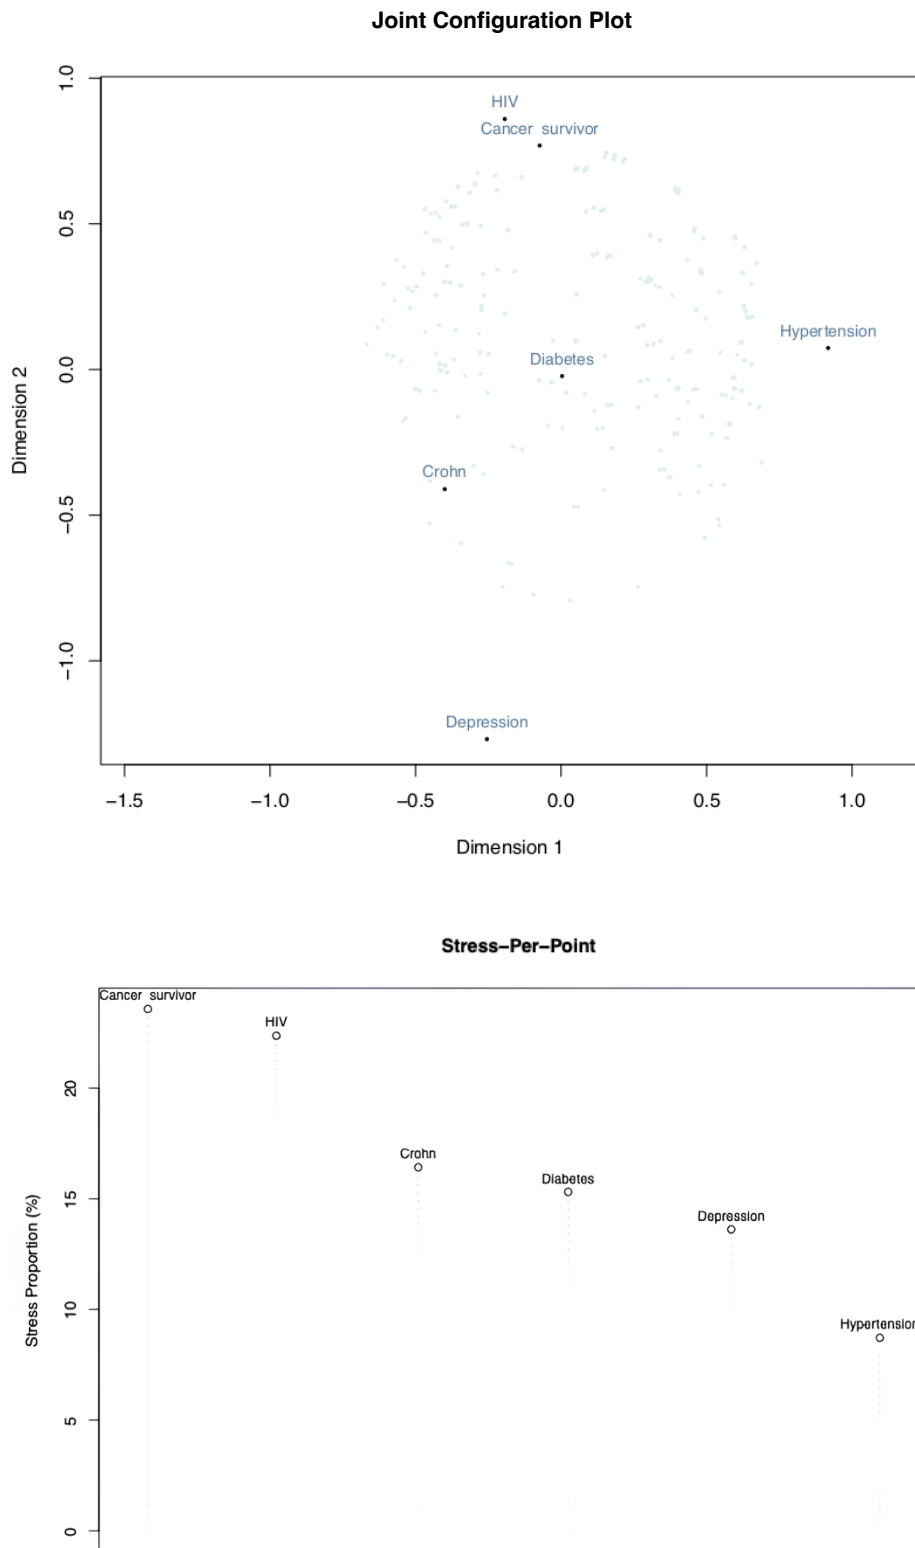

**Figure S3.** Top: Two-dimensional unfolding ordinal solution plot of individuals (light dots) and objects (dark dots). Bottom: Stress Per Point diagram illustrating the contribution of each object to the overall stress of the solution.
